# Supplementary material for: Spatial and Single-Cell Transcriptional Profiling Identifies Functionally Distinct Human Dermal Fibroblast Subpopulations
Source: PubMed Central journal article supplement (PMC5869055; doi:10.1016/j.jid.2018.01.016), 2018-04

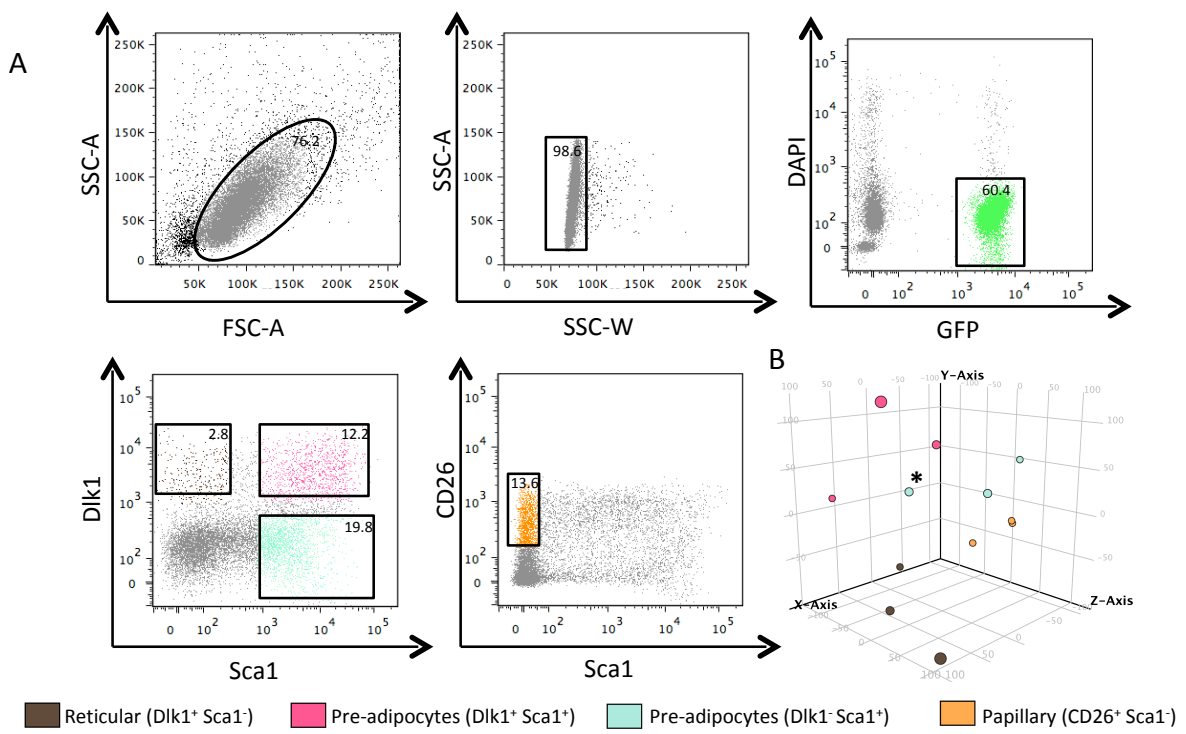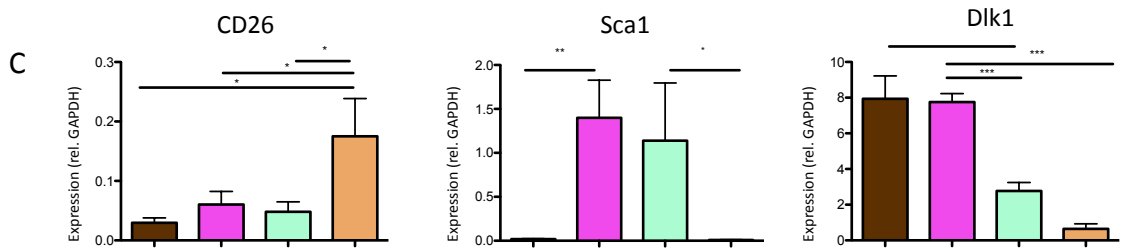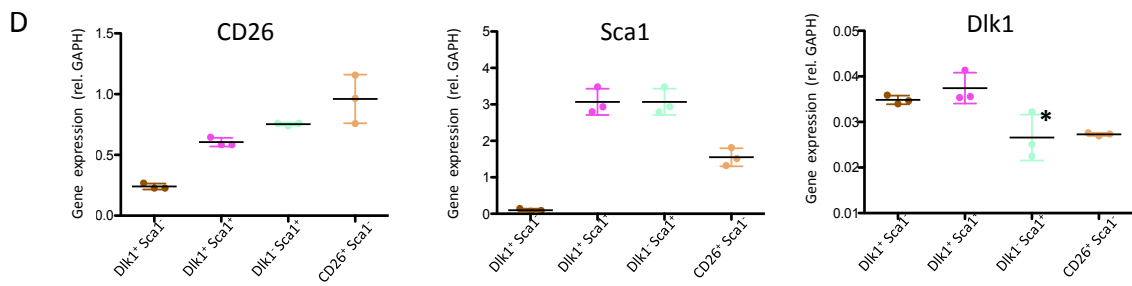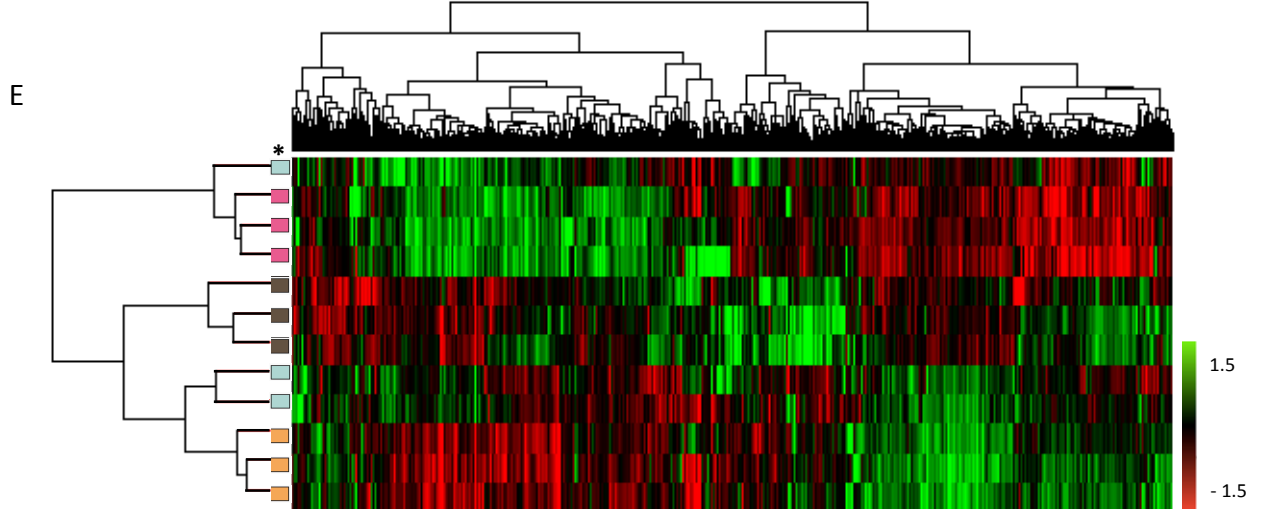

Supplementary Figure S1

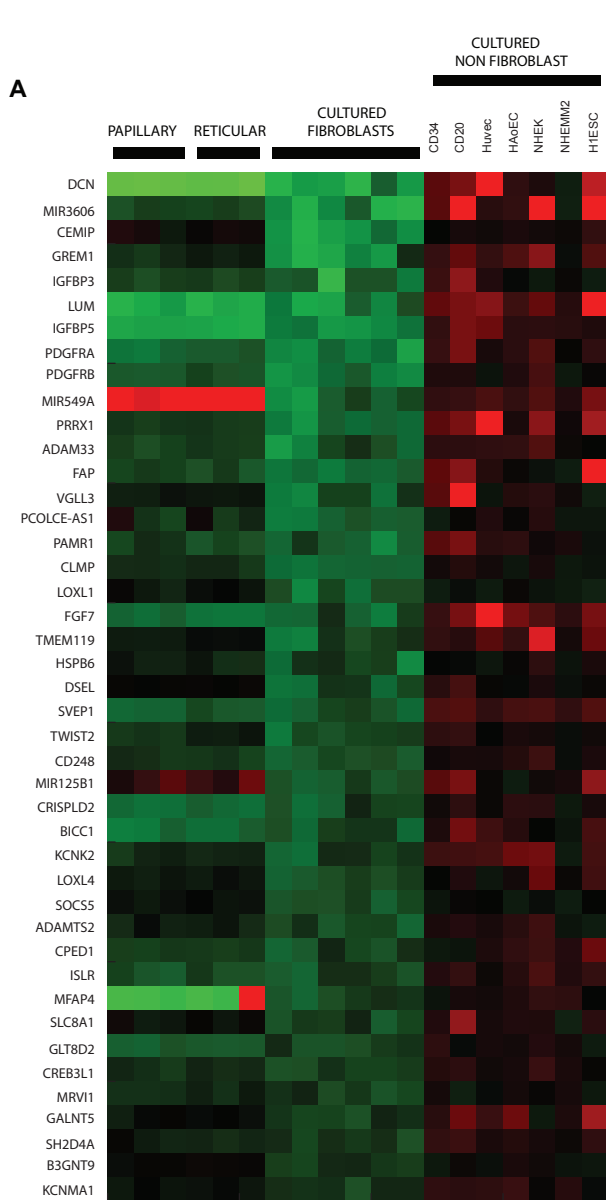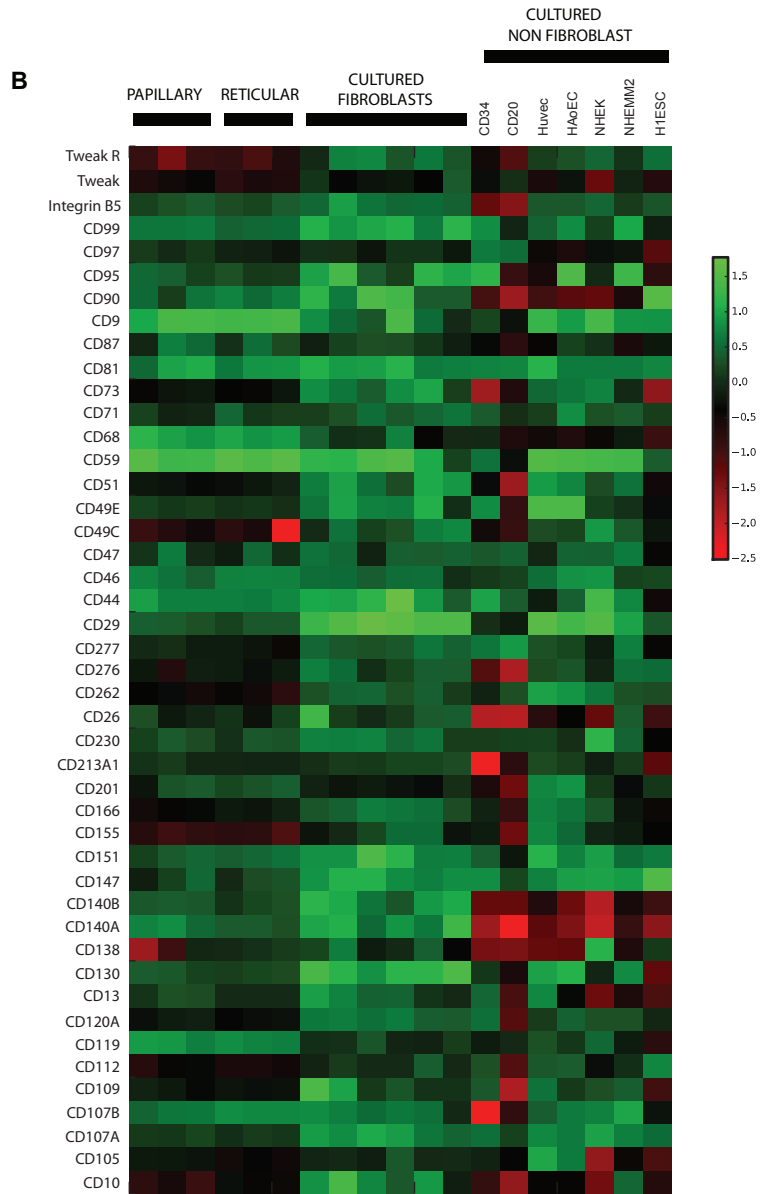

High expression in cultured fibroblasts - cell surface  
 $\min(\text{cultured fibroblast}) > 0.4$  and cell surface

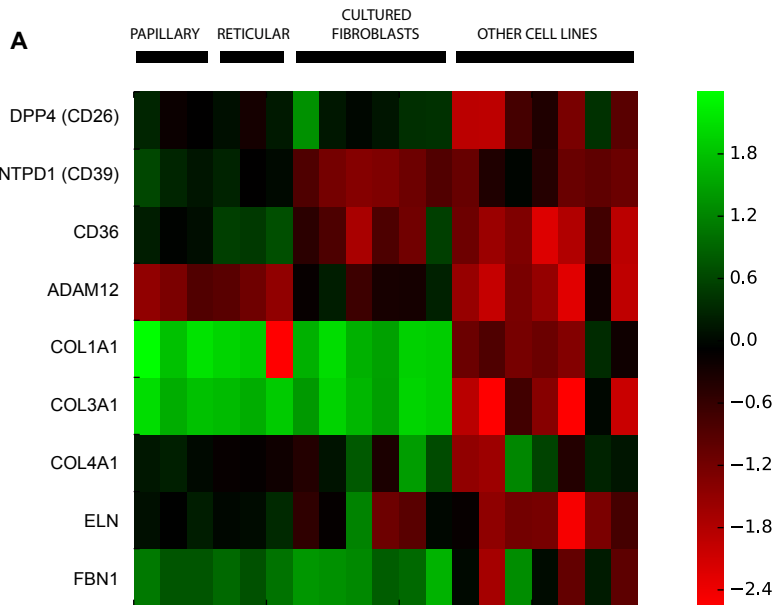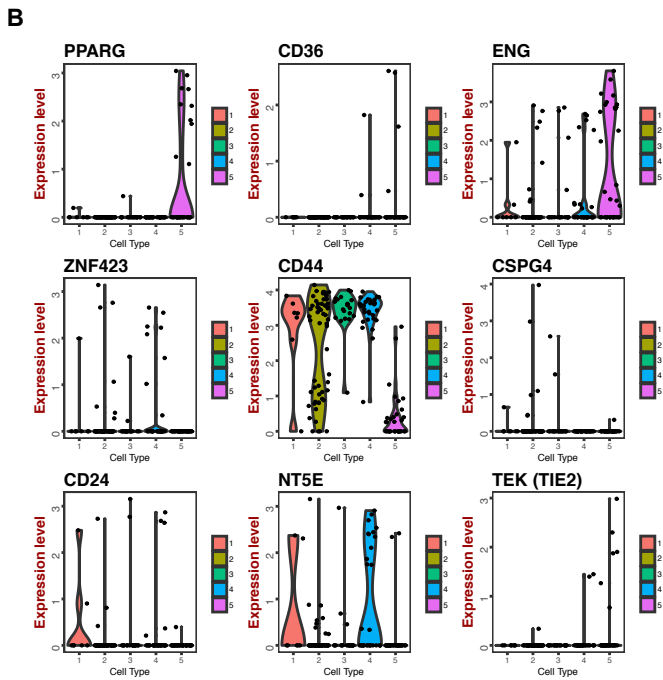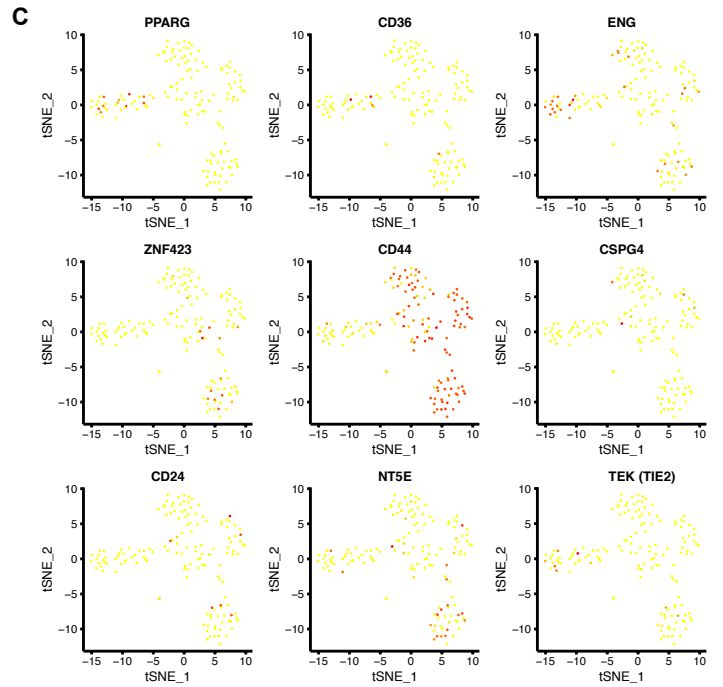

Supplement: mmc1.pdf [file mmc1.pdf]
